# Supplementary material for: mQTL-seq delineates functionally relevant candidate gene harbouring a major QTL regulating pod number in chickpea
Source: PubMed Central journal article supplement — DNA Res. 2015 Dec 19;23(1):53–65. doi: 10.1093/dnares/dsv036 (PMC4755527; doi:10.1093/dnares/dsv036), 2015-12-19
Supplement: supp_dsv036_dsv036supp_fig1.pdf [file supp_dsv036_dsv036supp_fig1.pdf]

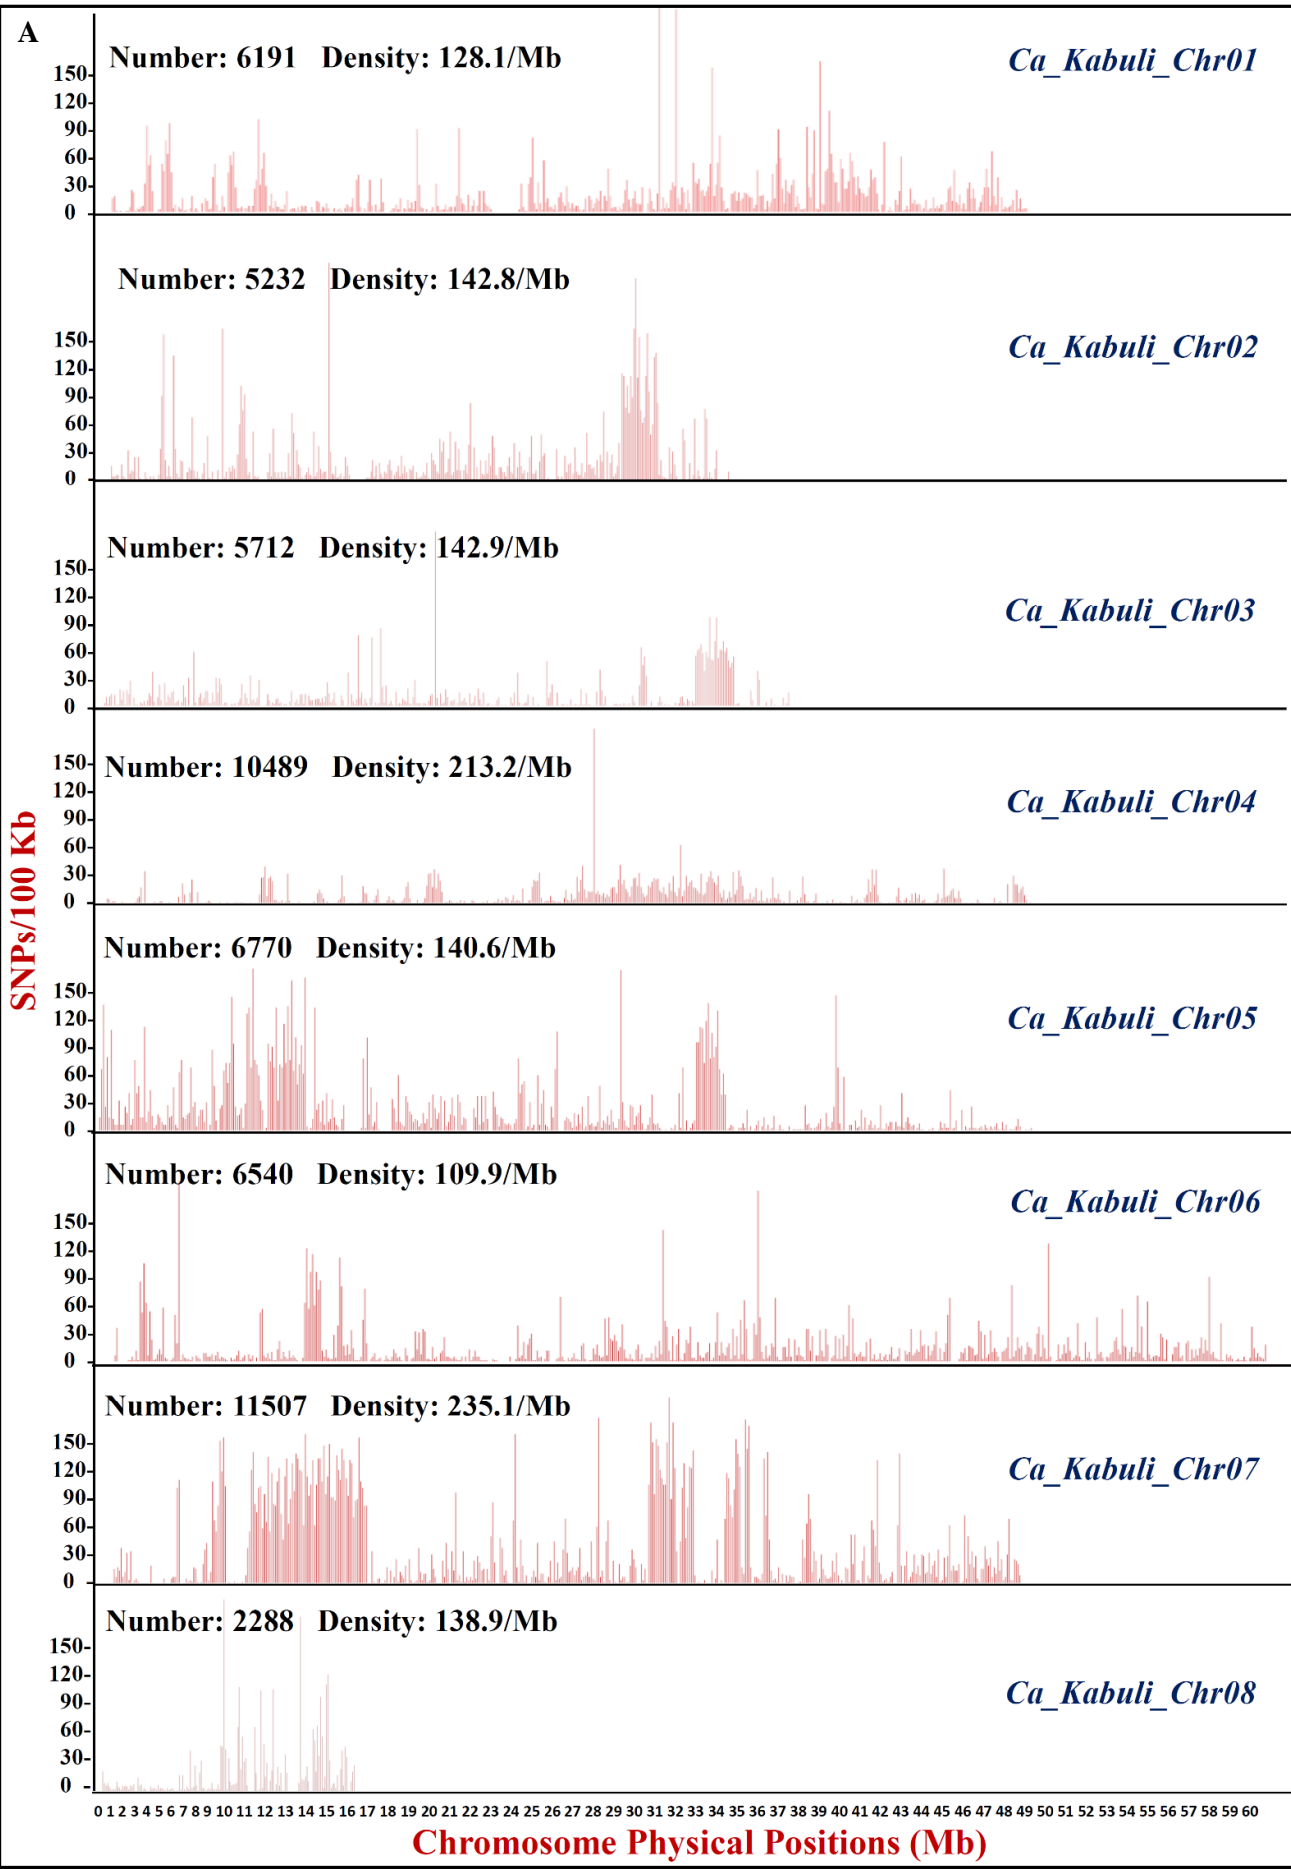

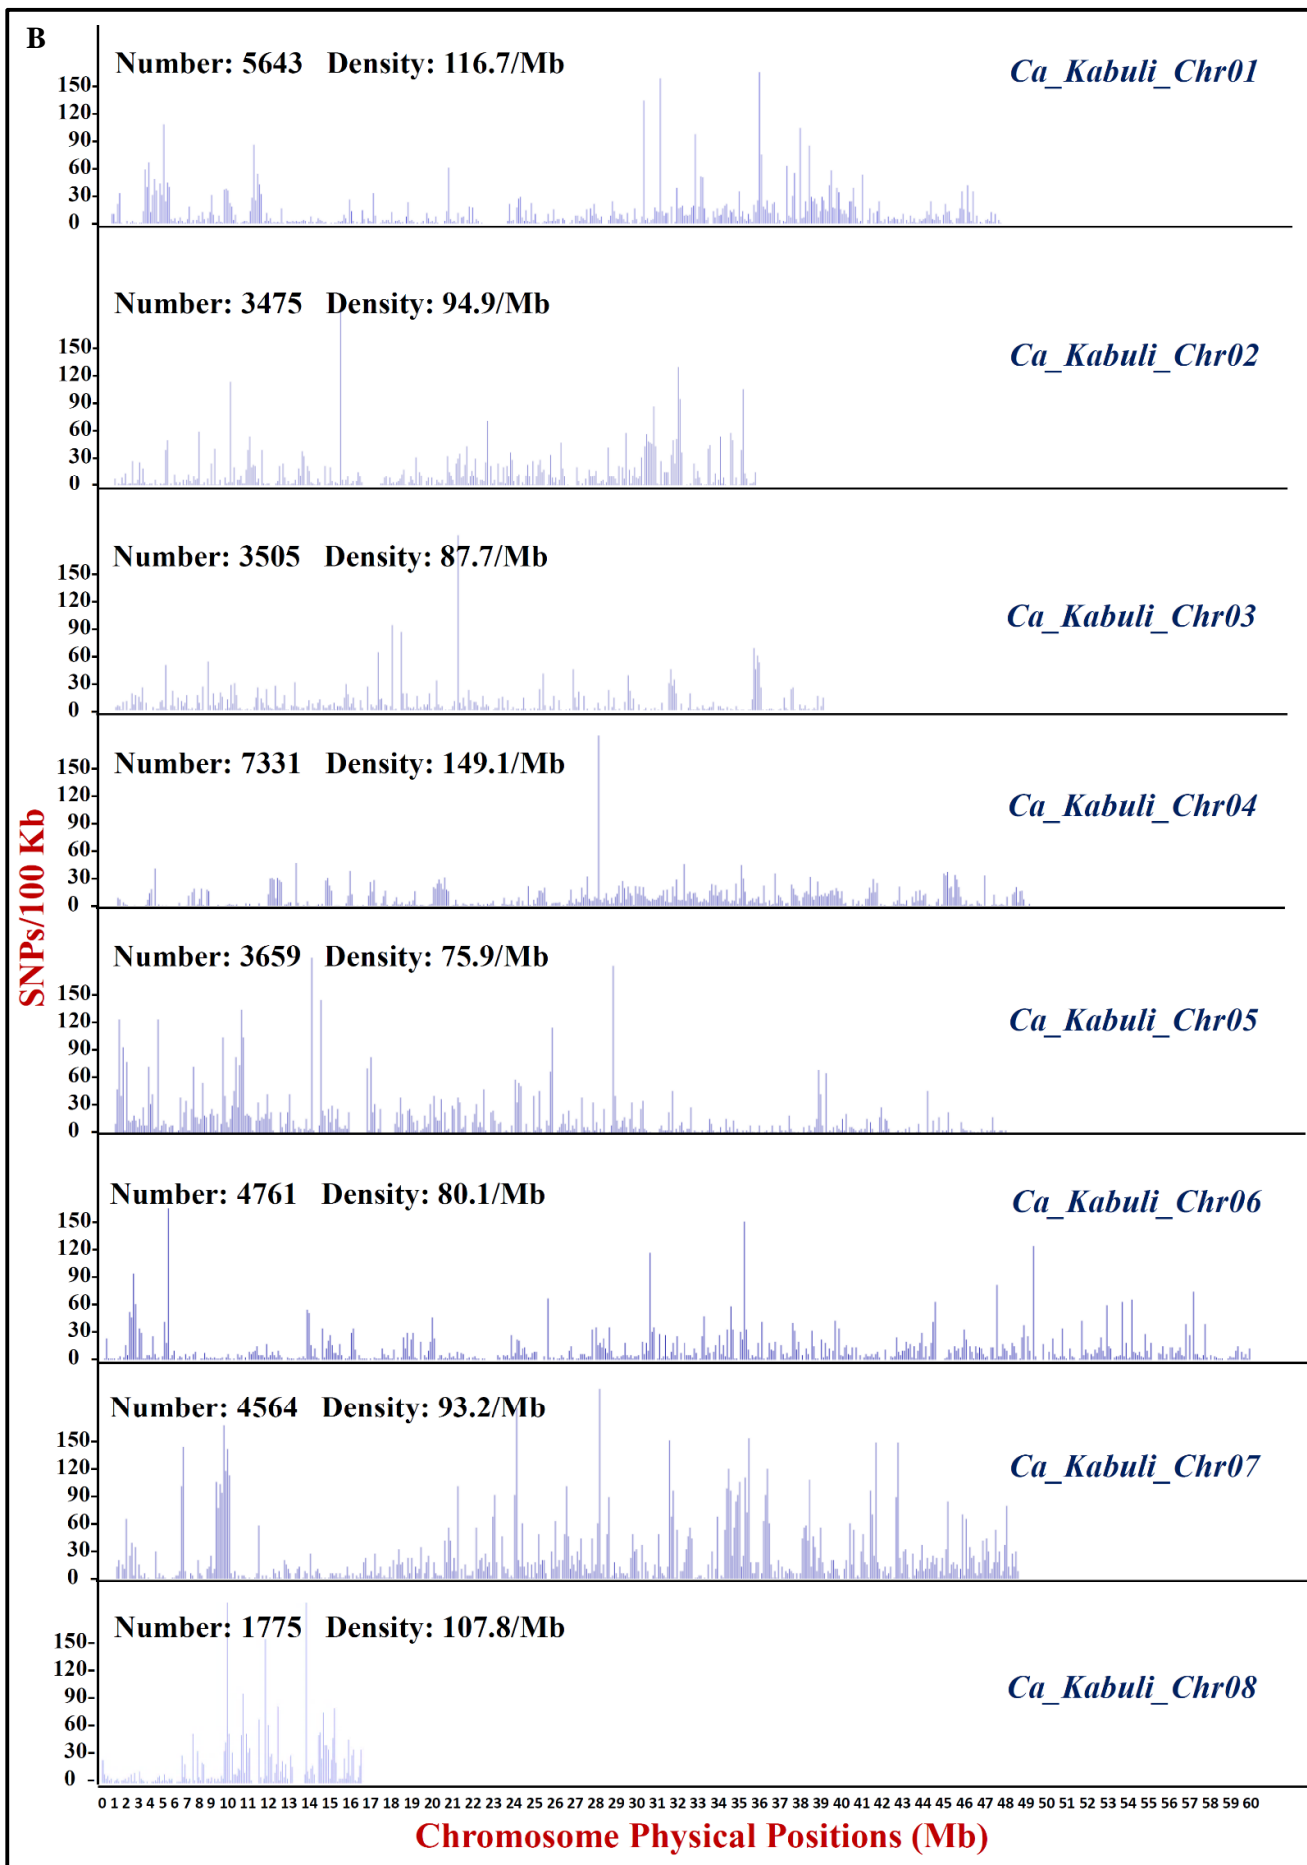

**Figure S1:** Genome scan plots depicting the density of 108170 and 77097 SNPs identified commonly between high and low-pod number-containing parental accessions and homozygous bulks of two mapping population [(A: Pusa 1103 x ILWC 46) and (B: Pusa 256 x ILWC 46)] with respect to their congruent physical positions on *kabuli* reference genome. These SNPs are physically mapped across eight *kabuli* chickpea chromosomes at 100-kb sliding window. The SNP density is defined as number of SNPs mapped within 1-Mb physical interval of chromosomes.
