# Supplementary material for: mQTL-seq delineates functionally relevant candidate gene harbouring a major QTL regulating pod number in chickpea
Source: PubMed Central journal article supplement — DNA Res. 2015 Dec 19;23(1):53–65. doi: 10.1093/dnares/dsv036 (PMC4755527; doi:10.1093/dnares/dsv036), 2015-12-19
Supplement: supp_dsv036_dsv036supp_table1.pdf [file supp_dsv036_dsv036supp_table1.pdf]

**Table S1:** Summary of normalized individual sequence reads obtained from low and high pod number-containing parents and bulks of two inter-specific mapping populations mapped on *kabuli* chickpea genome

| Characteristics                                                                       | Pusa 1103 X ILWC 46 |         |       |       | Pusa 256 X ILWC 46 |         |       |       | Total |
|---------------------------------------------------------------------------------------|---------------------|---------|-------|-------|--------------------|---------|-------|-------|-------|
|                                                                                       | Pusa 1103           | ILWC 46 | LPNB  | HPNB  | Pusa 256           | ILWC 46 | LPNB  | HPNB  |       |
| Sequencing depth of coverage (fold)                                                   | 12.3                | 11.8    | 10.7  | 12.5  | 12.7               | 11.8    | 11.1  | 10.3  | 11.6  |
| Genome coverage (%) by uniquely mapped sequence reads                                 | 64.7                | 63.5    | 64.1  | 65.2  | 65.1               | 63.5    | 63.8  | 62.7  | 64.1  |
| Genomic regions (Mb) covered (considering estimated chickpea genome size of ~ 740 Mb) | 478.8               | 469.9   | 474.3 | 482.5 | 481.7              | 469.9   | 472.1 | 464.0 | 474.2 |
